# Supplementary material for: UV-assisted photochemical transformation of a tetranuclear copper(ii) complex: a DFT supported study on β-lactamase inhibitory activity towards antibiotic resistance
Source: Royal Society of Chemistry journal article supplement (doi:10.1039/d4dt00357h), 2024-01-01
Supplement: d4dt00357h1.pdf [file d4dt00357h1.pdf]

**UV-Assisted Photochemical Transformation of Tetranuclear Copper(II)  
Complex: A DFT Supported Study in  $\beta$ -Lactamase Inhibitory Activity  
Towards Antibiotic Resistance**

SnehaBiswas<sup>a</sup>, SuhanaKarim<sup>a,b\*</sup>, PradipBhunias<sup>a</sup>, SoumadipBanerjee<sup>c</sup>, Abhijit K. Das<sup>c</sup> and  
DebasisDas<sup>a\*</sup>

<sup>a</sup>Department of Chemistry, University College of Science, University of Calcutta, 92 A. P. C. Road, Kolkata 700009, India

<sup>b</sup>Department of Chemistry, Indian Institute of Technology Bombay, Powai, Mumbai-400076, India

<sup>c</sup>School of Mathematical & Computational Sciences, Indian Association for the Cultivation of Science, 2A & 2B, Raja S. C. Mullick Road, Jadavpur, Kolkata-700032, India

†Supplementary information (SI) available: Experimental details.

CCDC reference number 2294712-2294713

E-mail: dasdebasis2001@yahoo.com

## SUPPORTING INFORMATION

Total number of pages: 20

Total number of Figs: 11

Total number of Tables: 7

### Index

| Sl. No. | Contents                                                                                                                              | Page No. |
|---------|---------------------------------------------------------------------------------------------------------------------------------------|----------|
| 1.      | FT-IR spectrum of complex 1(Fig S1)                                                                                                   | S3       |
| 2.      | UV-Vis spectra of complex 1 and complex 2 (Fig S2)                                                                                    | S3       |
| 3.      | ESI-MS studies of complex 1 (Fig S3)                                                                                                  | S4       |
| 4.      | H-bonded structure of complex 1(Fig S4)                                                                                               | S5       |
| 5.      | Selected bond lengths and bond angles of complex 1 (Table S1 and Table S2)                                                            | S5-S6    |
| 6.      | Geometrical features of hydrogen bonding interactions (distances (Å) and angles (°))in Complexes1 and 2(Table S3)                     | S7       |
| 7       | H-bonded structure of complex 2 (Fig S5)                                                                                              | S8       |
| 8.      | Selected bond lengths and bond angles of complex 2(Table S4)                                                                          | S8-S9    |
| 9.      | Bond valence sum (BVS) calculations for complexes 1 and 2(Table S5)                                                                   | S9       |
| 10.     | Non interfering behavior of nitrocefin in the transformation of C2 from C1 in methanol-water solvent under UV lamp(Fig S6)            | S9       |
| 11.     | FT-IR spectrum of complex 2 (Fig S7)                                                                                                  | S10      |
| 12.     | ESI-MS studies of complex 2 (Fig S8)                                                                                                  | S10      |
| 13.     | Isothermal titration calorimetry profiles for C2 binding to chloride ion(Fig S9)                                                      | S11      |
| 14.     | The molecular electrostatic potential analysis (MEP) diagram of C1(Fig S10)                                                           | S11      |
| 15.     | Calculated HOMO-LUMO energy gaps of C1 in the solvent phase(Table S6)                                                                 | S12      |
| 16.     | Schematic representation of photocatalytic mechanism of chlorate reduction in presence of C1 in 70:30 v/v MeOH-water medium (Fig S11) | S12      |
| 17.     | Comparing the kinetic parameters with other analogous zinc or copper complexes for hydrolysis of nitrocefin (Table S7)                | S13-S14  |
| 18.     | Cartesian Co-ordinate of C1 (TPSSH optimized)                                                                                         | S14-S19  |
| 19.     | References                                                                                                                            | S19-S20  |

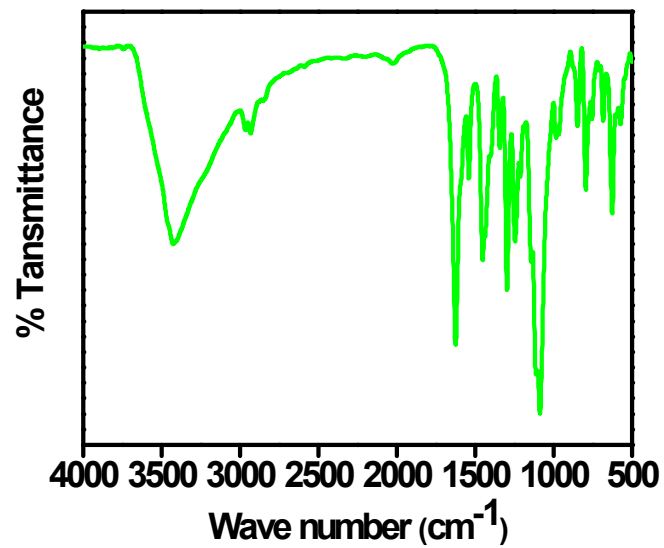

Fig S1. FT-IR spectrum of complex 1

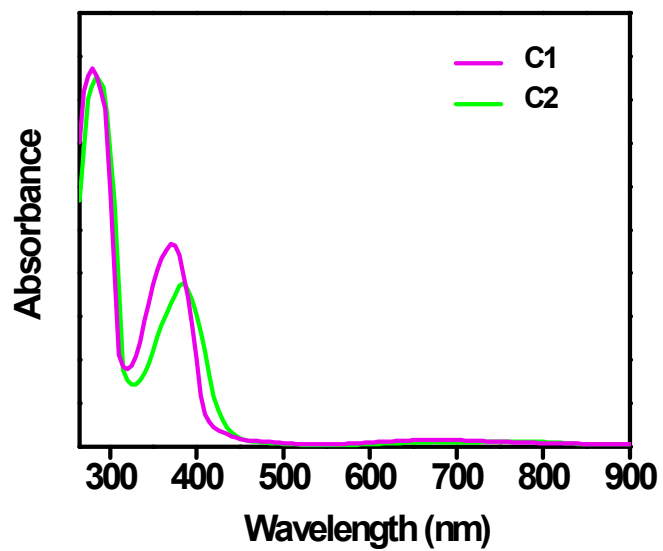

Fig S2. UV-Vis spectra of complex 1 and complex 2

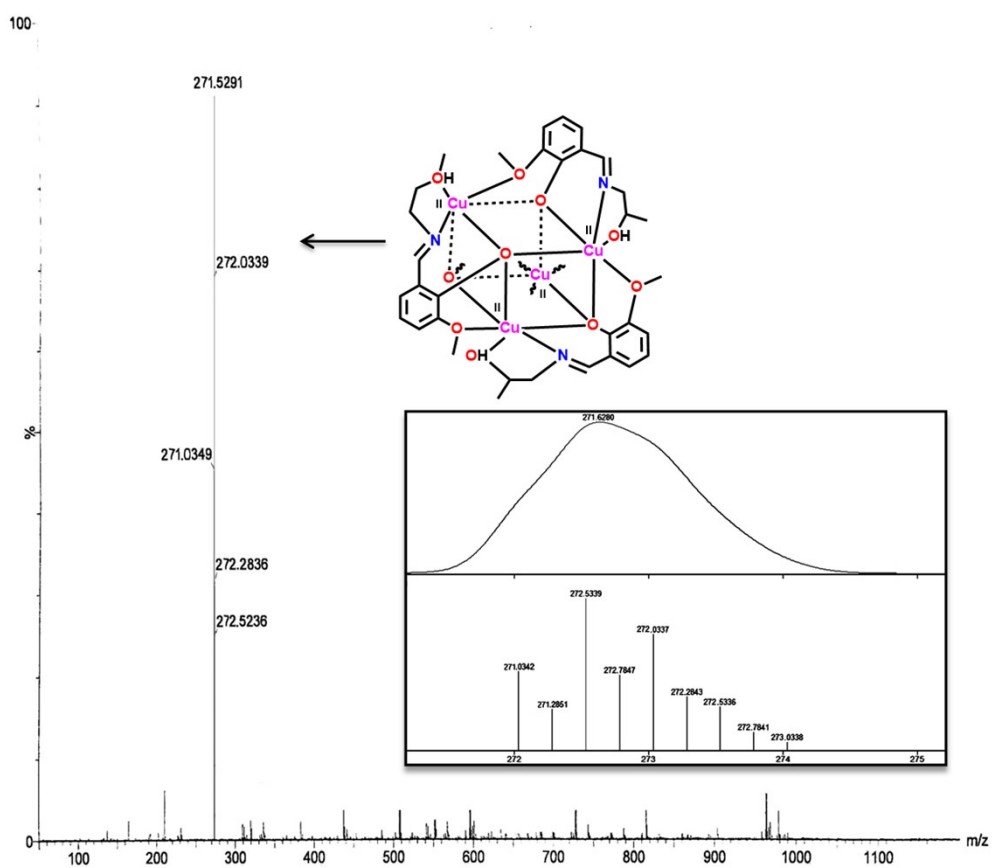

**Fig S3.**ESI-MS spectrum of complex 1

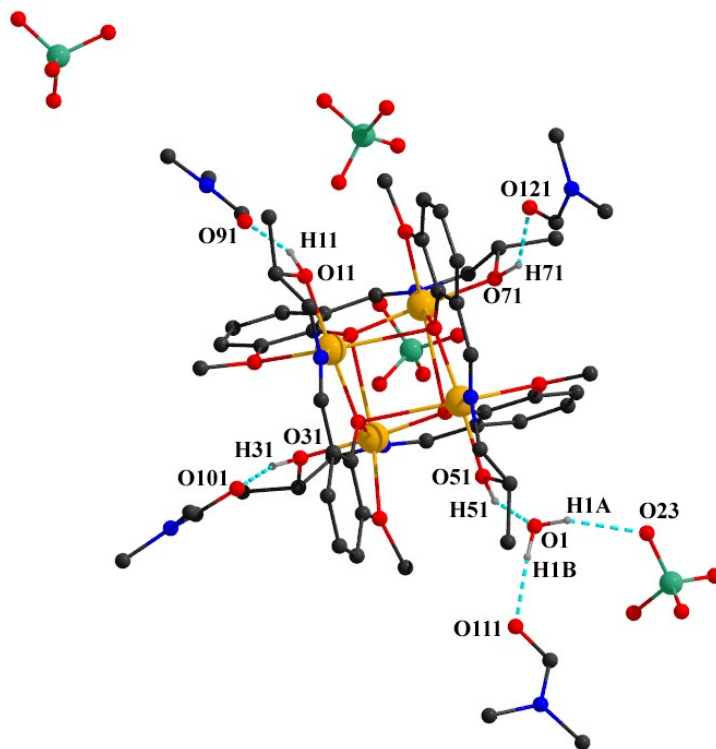

**Fig S4.** H-bonded structure of complex **1**. H-bonds are shown by dotted lines.

**Table S1.** Selected bond lengths of complex **1**

| Bond lengths (Å) |          |          |          |
|------------------|----------|----------|----------|
| Cu1–O11          | 1.987(4) | Cu3–O22  | 2.651(4) |
| Cu1–O22          | 1.972(3) | Cu3 –O41 | 2.288(4) |
| Cu1–O62          | 2.673(4) | Cu3–O42  | 1.956(3) |
| Cu1–O81          | 2.305(4) | Cu3 –O51 | 1.992(5) |
| Cu1–O82          | 1.973(4) | Cu3 –O62 | 1.968(3) |
| Cu1–N14          | 1.922(4) | Cu3 –N54 | 1.905(4) |
| Cu2–O21          | 2.324(4) | Cu4 –O42 | 2.758(4) |
| Cu2–O22          | 1.973(3) | Cu4 –O61 | 2.297(5) |
| Cu2–O31          | 1.957(4) | Cu4 –O62 | 1.991(3) |
| Cu2–O42          | 1.947(4) | Cu4 –O71 | 1.963(4) |
| Cu2–O82          | 2.666(4) | Cu4–O82  | 1.970(4) |
| Cu2–N83          | 1.923(5) | Cu4 –N74 | 1.924(5) |

**Table S2.** Selected bond angles of complex **1**

| Bond angles (°) |            |                |            |
|-----------------|------------|----------------|------------|
| O11 – Cu1 – O22 | 175.64(15) | O22 – Cu3– O41 | 146.78(13) |
| O11 – Cu1 – O62 | 97.95(14)  | O22 – Cu3– O42 | 71.77(13)  |
| O11 – Cu1 – O81 | 87.11(16)  | O22 – Cu3– O51 | 95.62(14)  |
| O11 – Cu1 – O82 | 94.06(15)  | O22 – Cu3– O62 | 81.36(13)  |
| O11 – Cu1 – N14 | 83.62(18)  | O22 – Cu3–N54  | 103.45(18) |
| O22 – Cu1 – O62 | 80.72(13)  | O41– Cu3– O42  | 75.24(14)  |
| O22 – Cu1 – O81 | 96.32(16)  | O41– Cu3– O51  | 89.92(17)  |
| O22 – Cu1 – O82 | 89.47(14)  | O41– Cu3– O62  | 94.62(16)  |
| O22 – Cu1 – N14 | 92.53(18)  | O41– Cu3–N54   | 109.7(2)   |
| O62 – Cu1 – O81 | 145.87(13) | O42– Cu3– O51  | 93.24(15)  |
| O62 – Cu1 – O82 | 71.48(12)  | O42– Cu3– O62  | 89.31(14)  |
| O62 – Cu1 – N14 | 100.67(14) | O42– Cu3–N54   | 173.8(2)   |
| O81 – Cu1 – O82 | 74.52(14)  | O51– Cu3– O62  | 175.23(16) |
| O81 – Cu1 – N14 | 113.45(16) | O51– Cu3–N54   | 83.23(19)  |
| O82 – Cu1 – N14 | 171.48(16) | O62– Cu3–N54   | 93.86(18)  |
| O21 – Cu2– O22  | 74.48(13)  | O42– Cu4– O61  | 143.36(12) |
| O21 – Cu2– O31  | 86.32(16)  | O42– Cu4– O62  | 68.83(12)  |
| O21 – Cu2– O42  | 99.56(14)  | O42– Cu4– O71  | 98.57(16)  |
| O21 – Cu2– O82  | 146.17(12) | O42– Cu4– O82  | 79.61(12)  |
| O21 – Cu2–N34   | 111.83(17) | O42– Cu4–N74   | 103.8(2)   |
| O22– Cu2– O31   | 94.39(16)  | O61– Cu4– O62  | 74.76(14)  |
| O22– Cu2– O42   | 89.46(14)  | O61– Cu4– O71  | 88.47(17)  |
| O22– Cu2– O82   | 71.77(12)  | O61– Cu4– O82  | 95.95(14)  |
| O22– Cu2–N34    | 173.11(18) | O61– Cu4–N74   | 112.7(2)   |
| O31– Cu2– O42   | 173.67(16) | O62– Cu4– O71  | 95.15(16)  |
| O31– Cu2– O82   | 94.02(16)  | O62– Cu4– O82  | 88.84(14)  |
| O31– Cu2–N34    | 83.49(17)  | O62– Cu4–N74   | 172.2(2)   |
| O42– Cu2– O82   | 82.41(13)  | O71– Cu4– O82  | 174.71(17) |
| O42– Cu2–N34    | 92.11(16)  | O71– Cu4–N74   | 83.3(2)    |
| O82– Cu2–N34    | 101.79(16) | O82– Cu4–N74   | 92.3(2)    |

**Table S3.** Geometrical features of hydrogen bonding interactions (distances (Å) and angles (°)) in Complexes **1** and **2**

| Complex  | D–H···A                  | D–H (Å)   | H···A (Å) | D···A (Å) | ∠D–H···A (°) |
|----------|--------------------------|-----------|-----------|-----------|--------------|
| <b>1</b> | O(1) – H(1A) ··· Cl(1)   | 0.8500    | 2.3800    | 3.223(5)  | 171.00       |
|          | O(1) – H(1B) ··· Cl(3)   | 0.8500    | 2.4000    | 3.225(5)  | 163.00       |
|          | O(2) – H(2A) ··· Cl(2)   | 0.8800    | 2.3400    | 3.144(4)  | 153.00       |
|          | O(2) – H(2B) ··· Cl(1)   | 0.8800    | 2.2200    | 3.066(5)  | 161.00       |
|          | O(3) – H(3A) ··· Cl(3)   | 0.8800    | 2.5100    | 3.185(5)  | 134.00       |
|          | O(3) – H(3B) ··· Cl(1)   | 0.8800    | 2.2000    | 3.073(5)  | 175.00       |
|          | O(11) – H(11) ··· O(1)   | 0.86(8)   | 1.76(6)   | 2.581(7)  | 160(11)      |
| <b>2</b> | O(1) – H(1A) ··· O(23)   | 0.8700    | 2.1600    | 2.885(8)  | 140.00       |
|          | O(1) – H(1B) ··· O(111)  | 0.8700    | 1.8100    | 2.656(9)  | 165.00       |
|          | O(11) – H(11) ··· O(91)  | 0.88(3)   | 1.73(3)   | 2.584(6)  | 161(4)       |
|          | O(31) – H(31) ··· O(101) | 0.88(3)   | 1.78(3)   | 2.606(6)  | 156(4)       |
|          | O(51) – H(51) ··· O(1)   | 0.879(14) | 1.77(3)   | 2.592(7)  | 155(5)       |
|          | O(71) – H(71) ··· O(121) | 0.88(2)   | 1.78(4)   | 2.519(9)  | 140(4)       |

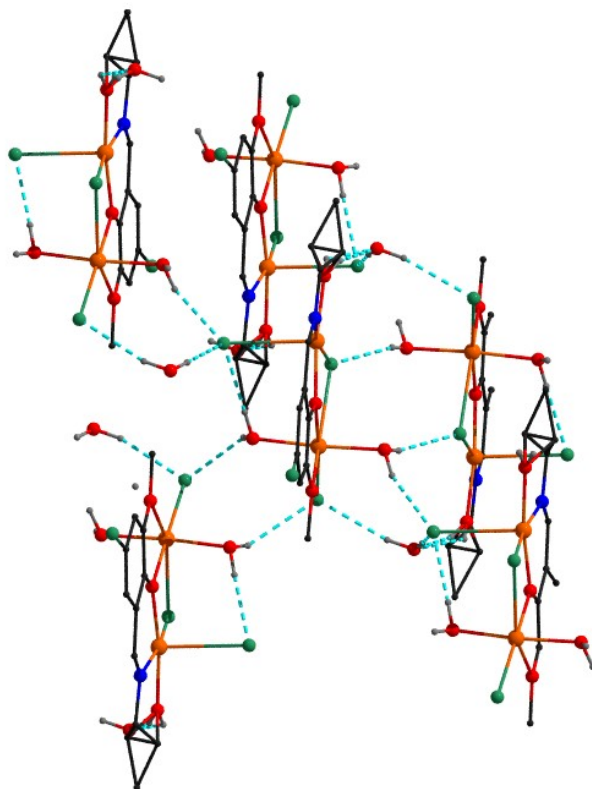

**Fig S5.**H-bonded structure of complex **2**. H-bonds are shown by dotted lines.

**Table S4.** Selected bond parameters of complex **2**

| Bond lengths (Å) |            |                |            |
|------------------|------------|----------------|------------|
| Cu1 –Cl1         | 2.7550(18) | Cu2 –Cl2       | 2.691(2)   |
| Cu1 –Cl2         | 2.2603(18) | Cu2 –Cl3       | 2.262(3)   |
| Cu1 – O11        | 1.985(6)   | Cu2 – O2       | 1.970(3)   |
| Cu1 – O22        | 1.941(5)   | Cu2 – O3       | 1.961(3)   |
| Cu1 – N14        | 1.923(6)   | Cu2 – O21      | 2.329(4)   |
|                  |            | Cu2 – O22      | 2.023(5)   |
| Bond angles (°)  |            |                |            |
| Cl1 –Cu1–Cl2     | 95.80(6)   | Cl2 –Cu2 – O21 | 149.18(15) |
| Cl1 –Cu1– O11    | 97.05(14)  | Cl2 –Cu2 – O22 | 76.45(14)  |
| Cl1 –Cu1– O22    | 89.48(11)  | Cl3 –Cu2 – O2  | 94.21(14)  |
| Cl1 –Cu1– N14    | 94.21(14)  | Cl3 –Cu2 – O3  | 91.20(16)  |



|               |            |                |            |
|---------------|------------|----------------|------------|
| Cl2 –Cu1– O11 | 94.03(13)  | Cl3 –Cu2 – O21 | 100.70(15) |
| Cl2 –Cu1– O22 | 89.41(13)  | Cl3 –Cu2 – O22 | 173.05(15) |
| Cl2 –Cu1– N14 | 169.66(17) | O2 –Cu2 – O3   | 174.6(2)   |
| O11 –Cu1– O22 | 172.27(17) | O2–Cu2 – O21   | 86.72(16)  |
| O11 –Cu1– N14 | 82.2(3)    | O2 –Cu2 – O22  | 88.59(16)  |
| O22 –Cu1– N14 | 93.3(2)    | O3–Cu2 – O21   | 91.82(18)  |
| Cl2 –Cu2 –Cl3 | 109.96(7)  | O3 –Cu2 – O22  | 85.98(17)  |
| Cl2 –Cu2 – O2 | 88.00(15)  | O21 –Cu2 – O22 | 73.08(19)  |
| Cl2 –Cu2 – O3 | 90.60(16)  |                |            |

**Table S5.** Bond valence sum (BVS) calculations for complexes **1** and **2**

| Complex  | atom | Calculated BVS* |
|----------|------|-----------------|
| <b>1</b> | Cu1  | 2.035           |
|          | Cu2  | 2.089           |
|          | Cu3  | 2.092           |
|          | Cu4  | 2.044           |
| <b>2</b> | Cu1  | 2.108           |
|          | Cu2  | 2.021           |

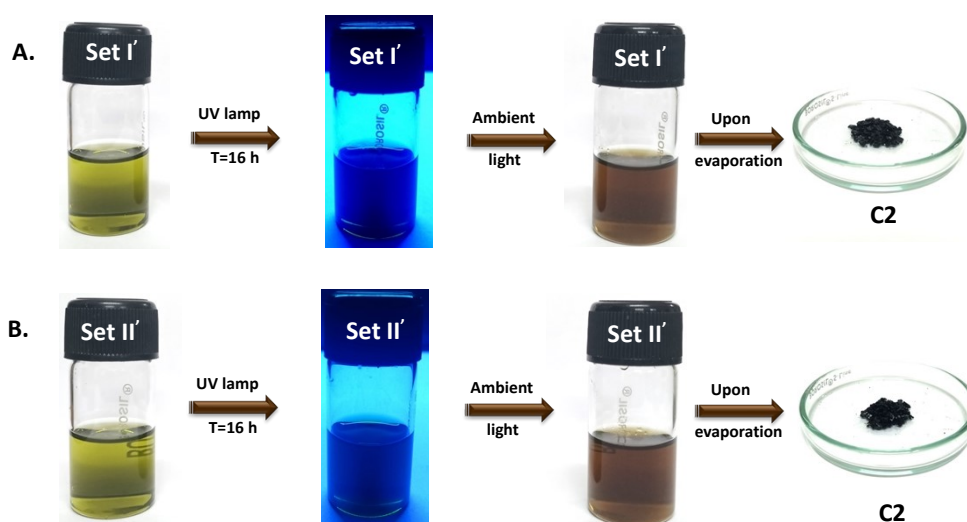

**Fig S6.** Pictorial representation for transformation of (A) Set I' (C1 only) and (B) Set II' (C1 + nitrocefin) in methanol-H<sub>2</sub>O into crystalline C2 under UV lamp.

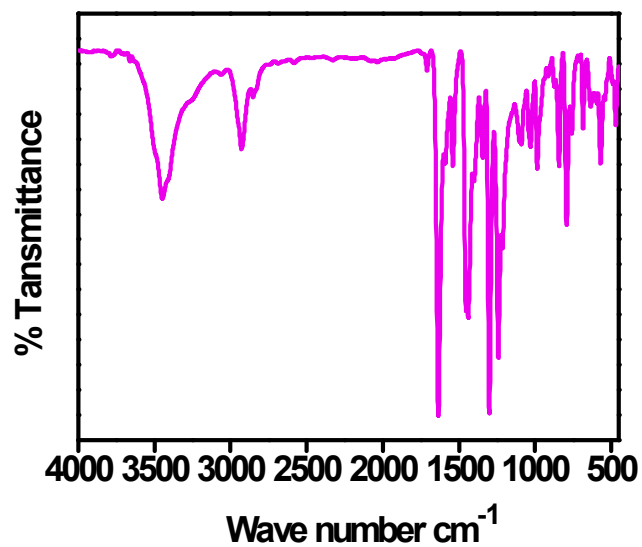

Fig S7. FT-IR spectrum of complex 2

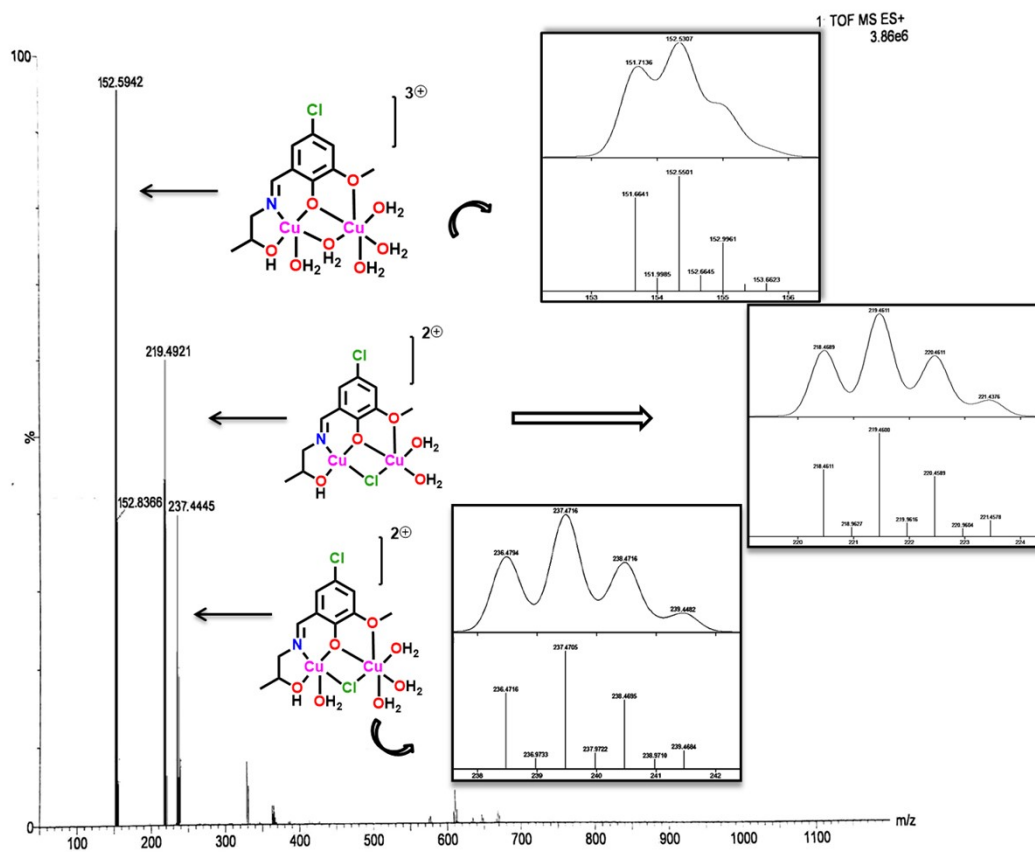

Fig S8. ESI-MS spectrum of complex 2

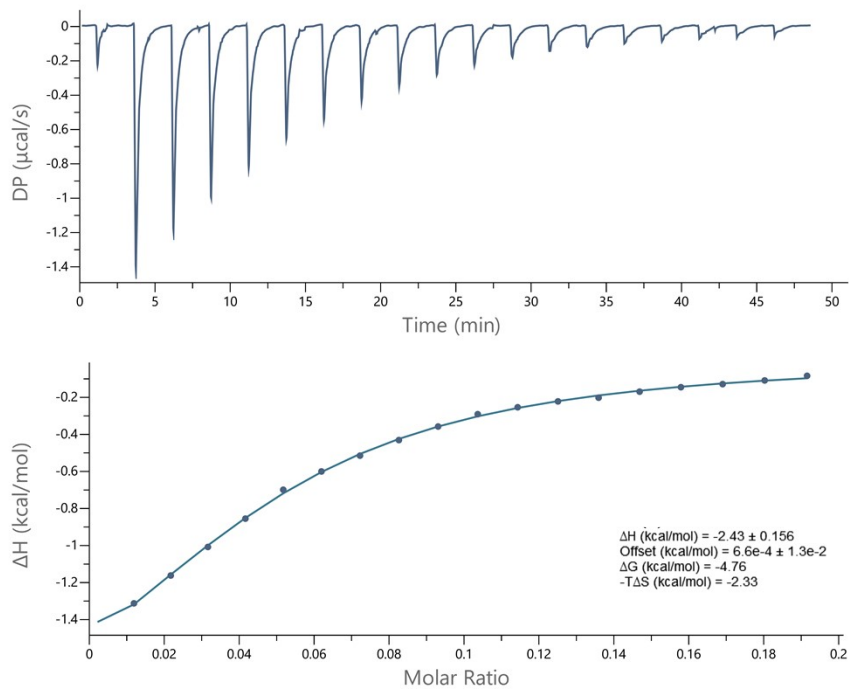

**Fig S9.** Isothermal titration calorimetry profiles for **C2** binding to chloride ion. Top panel: heat effects against time for the titration of **C2** ( $3 \mu\text{M}$ ) with chloride ion ( $4.5 \mu\text{M}$ ) in 70:30 methanol-water medium at  $25 \text{ }^\circ\text{C}$ . Bottom panel: the integrated heat effects after correction of the heat of dilution against the molar ratio of chloride.

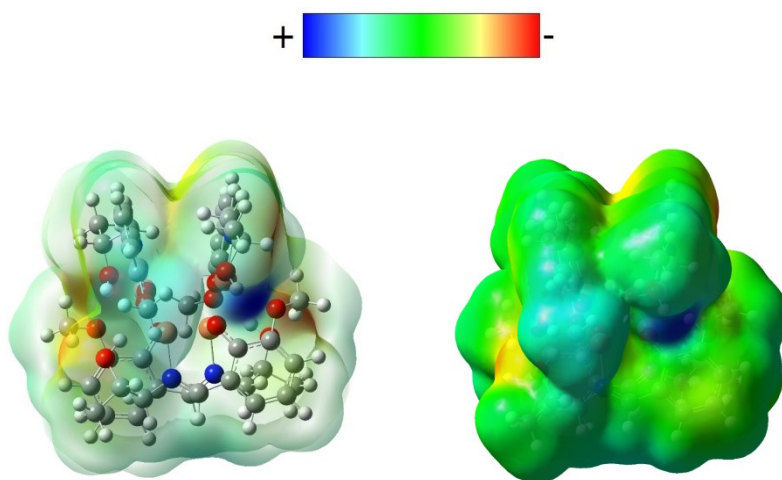

**Fig S10.** The molecular electrostatic potential analysis (MEP) diagram of **C1**

**Table S6: Calculated HOMO-LUMO energy gaps of complex 1 in the solvent phase; Gas phase values are also mentioned in the parenthesis.**

| System | E & ΔE (all in eV) | DFT Functionals |               |               |
|--------|--------------------|-----------------|---------------|---------------|
|        |                    | B3LYP           | TPSSH         | BP86          |
| 1      | E <sub>HOMO</sub>  | -4.81 (-4.44)   | -4.22 (-3.82) | -4.00 (-3.65) |
|        | E <sub>LUMO</sub>  | -1.43 (-1.17)   | -1.76 (-1.44) | -2.33 (-2.02) |
|        | ΔE                 | 3.38 (3.27)     | 2.46 (2.38)   | 1.67 (1.63)   |

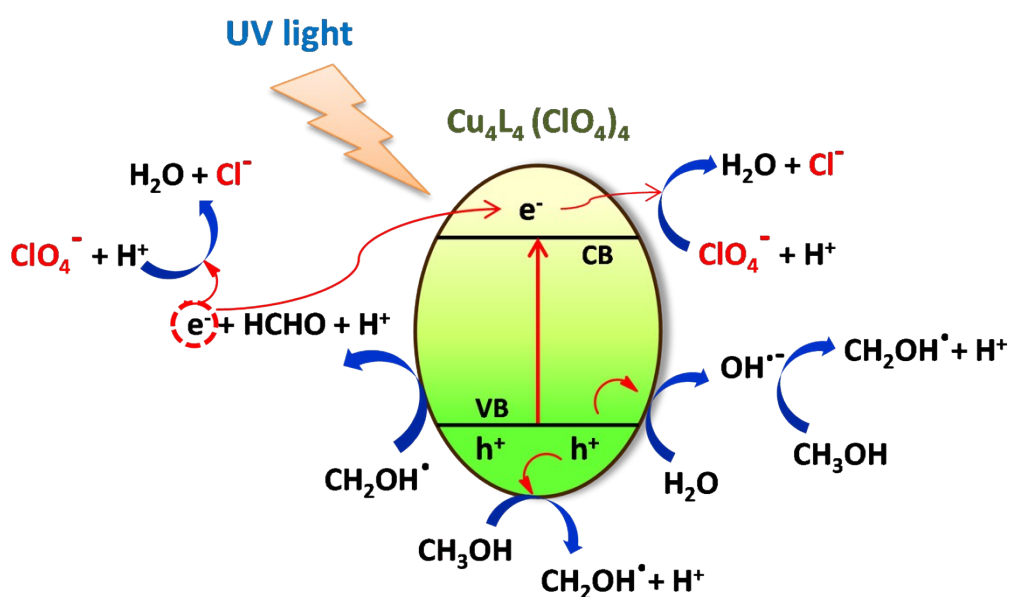

**Fig S11.** Schematic representation of photocatalytic mechanism of chlorate reduction in presence of Cl in 70:30 v/v MeOH-water medium. CB and VB present conduction and valence bands, respectively.

**Table S7: Comparing the kinetic parameters with other analogous zinc or copper complexes for hydrolysis of nitrocefin**

| Metal-based catalysts for hydrolysis of nitrocefin                                                                                                                      | $K_{cat}(S^{-1}$ or $min^{-1})$ or $V_{max}(mol L^{-1} S^{-1})$ | pH   | solvent               | $\lambda_{max}$ of hydrolysis pdt (nm) | Year <sup>ref</sup> |
|-------------------------------------------------------------------------------------------------------------------------------------------------------------------------|-----------------------------------------------------------------|------|-----------------------|----------------------------------------|---------------------|
| $[Cu_2L_2(H_2O)_2Cl_3](H_2O)$<br>[HL2=4-chloro-2-((2hydroxypropyl)imino)methyl)-6-methoxyphenol]                                                                        | $5 \times 10^3 min^{-1}$                                        | 7.5  | MeOH-water/tricine    | 486                                    | This article        |
| $[Cu_2L_2CH_3COO)_2]$<br>L=saldman                                                                                                                                      | $0.35 \times 10^{-8} mol L^{-1} S^{-1}$                         | 7    | DMSO-phosphate buffer | 496                                    | 2017 <sup>1</sup>   |
| $[CuZnL_2CH_3COO)_2]$<br>L=saldman                                                                                                                                      | $0.48 \times 10^{-8} mol L^{-1} S^{-1}$                         | 7    | DMSO-phosphate buffer | 496                                    | 2017 <sup>1</sup>   |
| $Cu_2(H_2pat^1)(OH)^+$                                                                                                                                                  | $11.34 \times 10^{-3} S^{-1}$                                   | 11.5 | ACN-HEPES             | 390                                    | 2016 <sup>2</sup>   |
| $[Zn_2L_1(\mu-OAc)(OAc)_2(H_2O)]$<br>HL1=2-((diethylamino)methyl)-6-((dimethylamino)methyl)-4-methyl phenol                                                             | $4.12 \times 10^{-6} mol L^{-1} min^{-1}$                       | 7.5  | DMSO-HEPES            | oxacillin at 254 nm                    | 2011 <sup>3</sup>   |
| $[Zn_2L_1(\mu-NO_3)(NO_3)_2]$<br>L1= <i>N,N'</i> -bis(6-methyl-2-pyridylmethyl)- <i>N,N'</i> -bis(2-pyridylmethyl)- <i>N,N'</i> -bis(2-pyridylmethyl)ethane-1,2-diamine | $0.21 min^{-1}$                                                 | 7    | DMSO-MOPS             | 496                                    | 2001 <sup>4</sup>   |
| $[Zn_2(BPAN)(\mu-OH)(\mu-O_2PPh_2)](ClO_4)_2$<br>BPAN=2,7-bis[2-(2-pyridylethyl)aminomethyl]-1,8-naphthyridine                                                          | $0.075 min^{-1}$                                                | 7    | DMSO-MOPS             | 496                                    | 2001 <sup>4</sup>   |
| $[Zn_2L_1(i-NO_3)(NO_3)_2]$<br>[HL1=2,6-bis{[ <i>N</i> -(2-dimethylaminoethyl)- <i>N</i> -methyl] aminomethyl}-4-methylphenol]                                          | $6 \times 10^3 min^{-1}$                                        | 7.5  | DMSO-HEPES            | 486                                    | 2000 <sup>5</sup>   |
| $[Zn_2L_1(i-OMe)(NO_3)_2]$<br>[HL1=2,6-bis{[ <i>N</i> -(2-dimethylaminoethyl)- <i>N</i> -methyl] aminomethyl}-4-methylphenol]                                           | $4.2 \times 10^3 min^{-1}$                                      | 7.5  | DMSO-HEPES            | 486                                    | 2000 <sup>5</sup>   |
| $[Zn_2L_1(i-OH)(NO_3)_2]$<br>[HL1=2,6-bis{[ <i>N</i> -(2-dimethylaminoethyl)- <i>N</i> -methyl] aminomethyl}-4-methylphenol]                                            | $3.1 \times 10^3 min^{-1}$                                      | 7.5  | DMSO-HEPES            | 486                                    | 2000 <sup>5</sup>   |
| $[Zn_2L_2(NO_3)_3]$<br>[HL2= <i>N,N</i> -bis(2-pyridylmethyl)- <i>tert</i> butylamine (bpta)]                                                                           | $13.7 \times 10^3 min^{-1}$                                     | 7.5  | DMSO-HEPES            | 486                                    | 2000 <sup>5</sup>   |
| $Zn(cyclen)(NO_3)_2$                                                                                                                                                    | $2.8 \times 10^3 min^{-1}$                                      | 7.5  | DMSO-                 | 486                                    | 2000 <sup>5</sup>   |

|                                                                                                                                                                                                                                                                                                                             |                                     |            |                        |            |                         |
|-----------------------------------------------------------------------------------------------------------------------------------------------------------------------------------------------------------------------------------------------------------------------------------------------------------------------------|-------------------------------------|------------|------------------------|------------|-------------------------|
|                                                                                                                                                                                                                                                                                                                             |                                     |            | <b>HEPES</b>           |            |                         |
| Zn(bpta)(NO <sub>3</sub> ) <sub>2</sub>                                                                                                                                                                                                                                                                                     | $7.2 \times 10^3 \text{ min}^{-1}$  | <b>7.5</b> | <b>DMSO-<br/>HEPES</b> | <b>486</b> | <b>2000<sup>5</sup></b> |
| [Cd <sub>4</sub> (CO <sub>2</sub> EtH <sub>2</sub> L1) <sub>2</sub> (CH <sub>3</sub> COO) <sub>3.75</sub> C <sub>10.25</sub> (H <sub>2</sub> O) <sub>2</sub> ](PF <sub>6</sub> ) <sub>2</sub><br>[CO <sub>2</sub> EtH <sub>2</sub> L1=Ethyl 4-Hydroxy-3,5-bis(((2-methoxyethyl)-(pyridin-2-ylmethyl)amino)Methyl)Benzoate)] | $9.4 \times 10^{-3} \text{ S}^{-1}$ | <b>8</b>   | <b>ACN-<br/>HEPES</b>  | <b>510</b> | <b>2012<sup>6</sup></b> |
| [Cd <sub>2</sub> (CO <sub>2</sub> EtL2)(CH <sub>3</sub> COO) <sub>2</sub> ](PF <sub>6</sub> )<br>[CO <sub>2</sub> EtL2=Ethyl 4-Hydroxy-3,5-bis(((2-methoxyethyl)-(pyridin-2-ylmethyl)amino)Methyl)Benzoate)]                                                                                                                | $9.7 \times 10^{-3} \text{ S}^{-1}$ | <b>8</b>   | <b>ACN-<br/>HEPES</b>  | <b>510</b> | <b>2012<sup>6</sup></b> |

Cartesian Co-ordinate of **1** (TPSSH optimized)

0 1

Cu        -0.90676800    1.95537500    -0.04380000  
 Cu        -0.90233300    -1.95734800    0.03840300  
 Cu        0.91053000    -0.03996500    -1.95228800  
 Cu        0.89843200    0.04196200    1.95758900  
 O         0.88693900    -1.84152800    -0.77629800  
 O        -0.87747900    0.77898300    -1.84505600  
 O        -0.88656300    -0.78221800    1.84092400  
 O        0.87765500    1.84385000    0.78227700  
 O        0.52864600    3.88000000    -0.91682300  
 O        -1.49260600    4.60194100    1.29935300  
 H        -0.88594700    4.31218400    0.59727800  
 O        1.49587600    1.30712900    -4.59702500  
 H        0.89150500    0.60251300    -4.30865300  
 O        -1.47360400    -4.60580200    -1.30850900

|   |             |             |             |
|---|-------------|-------------|-------------|
| H | -0.87150800 | -4.31501300 | -0.60293400 |
| O | -0.54332400 | 0.91815800  | 3.87668400  |
| O | 1.47037000  | -1.30226800 | 4.60723200  |
| H | 0.86622400  | -0.59941800 | 4.31412500  |
| O | -0.51739400 | -0.91831800 | -3.88052100 |
| O | 0.53209900  | -3.87998400 | 0.91909600  |
| N | 2.82242500  | -0.23561500 | -2.34611100 |
| N | -2.81257900 | -2.35989100 | 0.23109800  |
| N | -2.81700400 | 2.35269100  | -0.24749600 |
| N | 2.80733000  | 0.24240100  | 2.36370100  |
| C | 1.93260500  | 2.52375000  | 0.43847600  |
| C | 1.94119200  | -2.51958900 | -0.42687900 |
| C | -1.92971500 | 0.43069600  | -2.52687300 |
| C | 1.81714500  | 3.61492800  | -0.48798900 |
| C | -1.94391200 | -0.43547400 | 2.51557400  |
| C | -1.80822900 | -0.49520300 | -3.61789000 |
| C | -3.57803900 | -1.84122400 | 1.14016100  |
| H | -4.64529800 | -2.10101000 | 1.09793800  |
| C | 3.58396100  | -1.14647500 | -1.82484100 |
| H | 4.65240800  | -1.10606700 | -2.07999500 |
| C | -3.57569100 | 1.83211500  | -1.16111900 |
| H | -4.64384300 | 2.08915900  | -1.12527400 |
| C | -3.24499000 | 0.92604100  | -2.24209000 |

|   |             |             |             |
|---|-------------|-------------|-------------|
| C | 3.24519600  | 2.23657500  | 0.93952000  |
| C | 1.82251700  | -3.61171500 | 0.49805700  |
| C | 3.56992200  | 1.15492600  | 1.84694700  |
| H | 4.63682700  | 1.11725600  | 2.10888900  |
| C | -3.45608000 | 3.22867700  | 0.73529300  |
| H | -3.35202800 | 2.77031200  | 1.72592800  |
| H | -4.53055100 | 3.33245300  | 0.51670800  |
| C | 4.35346100  | -3.01810000 | -0.48734000 |
| H | 5.34141000  | -2.78123400 | -0.87559800 |
| C | 3.25612600  | -2.22940000 | -0.92006200 |
| C | -3.25623500 | -0.93390000 | 2.22275900  |
| C | -2.82263800 | 4.63343100  | 0.79362000  |
| H | -2.83059800 | 5.05411800  | -0.22523800 |
| C | -2.90016400 | -0.90007800 | -4.36274000 |
| H | -2.76562000 | -1.59894600 | -5.18215600 |
| C | 0.35243700  | 4.27531700  | -2.28292200 |
| H | -0.72164900 | 4.23165700  | -2.46980700 |
| H | 0.86689900  | 3.58045700  | -2.95458800 |
| H | 0.70360900  | 5.29974100  | -2.45192200 |
| C | -1.83147600 | 0.49175100  | 3.60647100  |
| C | 2.91667300  | -4.35279500 | 0.90384700  |
| H | 2.78409700  | -5.17333800 | 1.60178400  |
| C | 2.91219200  | 4.35777700  | -0.88811500 |



|   |             |             |             |
|---|-------------|-------------|-------------|
| H | 2.78216800  | 5.17741500  | -1.58758300 |
| C | 4.34345900  | 3.02719700  | 0.51269000  |
| H | 5.32958600  | 2.79260000  | 0.90690800  |
| C | -2.80635700 | -4.64062200 | -0.81018300 |
| H | -2.81897600 | -5.06133200 | 0.20861200  |
| C | -3.44358800 | -3.23742100 | -0.75548800 |
| H | -3.33470900 | -2.77876300 | -1.74546800 |
| H | -4.51909300 | -3.34382400 | -0.54333800 |
| C | 4.19466700  | 4.06400500  | -0.38527300 |
| H | 5.04854500  | 4.65491400  | -0.69946700 |
| C | 3.45902700  | 0.75029200  | -3.22039100 |
| H | 4.53459600  | 0.53624000  | -3.32222300 |
| H | 3.34993300  | 1.74026900  | -2.76179100 |
| C | 4.20149800  | -4.05598400 | 0.40885400  |
| H | 5.05470500  | -4.64548600 | 0.72748200  |
| C | -4.18536500 | -0.40284100 | -4.07125800 |
| H | -5.03678600 | -0.72071800 | -4.66374000 |
| C | -4.33995400 | 0.49441900  | -3.03471100 |
| H | -5.32820400 | 0.88437900  | -2.80194700 |
| C | -0.33458300 | -2.28285900 | -4.27804700 |
| H | 0.74004700  | -2.46577400 | -4.23110100 |
| H | -0.68169000 | -2.45107900 | -5.30399500 |
| H | -0.84881500 | -2.95795000 | -3.58634900 |

|   |             |             |             |
|---|-------------|-------------|-------------|
| C | -3.60470000 | -5.55423700 | -1.73598300 |
| H | -3.62002400 | -5.14449100 | -2.75162500 |
| H | -4.63732600 | -5.66664700 | -1.39065200 |
| H | -3.13890800 | -6.54202400 | -1.77598400 |
| C | 3.44075000  | -0.74155400 | 3.24244500  |
| H | 3.33683600  | -1.73198300 | 2.78360400  |
| H | 4.51516600  | -0.52496500 | 3.35090200  |
| C | 2.82801500  | 0.80680400  | -4.62632200 |
| H | 2.84093500  | -0.21175300 | -5.04760500 |
| C | -0.36616800 | 2.28314900  | 4.27505700  |
| H | -0.71978500 | 2.45069800  | 5.29889300  |
| H | -0.87787600 | 2.95690500  | 3.58018100  |
| H | 0.70828900  | 2.46857500  | 4.23445400  |
| C | -4.21124900 | 0.39447700  | 4.04468900  |
| H | -5.06714600 | 0.71098800  | 4.63142700  |
| C | 3.63171500  | 1.73195500  | -5.53588000 |
| H | 3.17028300  | 1.77327000  | -6.52565800 |
| H | 4.66429300  | 1.38512500  | -5.64401300 |
| H | 3.64679400  | 2.74731600  | -5.12543200 |
| C | -2.92906300 | 0.89495800  | 4.34386700  |
| H | -2.80138200 | 1.59502000  | 5.16335800  |
| C | -4.35720100 | -0.50411100 | 3.00804800  |
| H | -5.34307100 | -0.89648500 | 2.76932300  |

|   |             |             |            |
|---|-------------|-------------|------------|
| C | -3.62841900 | 5.54507000  | 1.71491500 |
| H | -3.64834100 | 5.13532700  | 2.73047900 |
| H | -4.65939400 | 5.65482700  | 1.36384800 |
| H | -3.16537400 | 6.53404200  | 1.75744000 |
| C | 3.60132600  | -1.72147600 | 5.55955600 |
| H | 3.13382700  | -1.76333200 | 6.54645900 |
| H | 4.63236500  | -1.37207300 | 5.67392200 |
| H | 3.62142500  | -2.73703800 | 5.14982000 |
| C | 0.34856100  | -4.27502800 | 2.28434500 |
| H | 0.85768000  | -3.57895000 | 2.95879600 |
| H | 0.70072900  | -5.29870000 | 2.45583900 |
| H | -0.72668800 | -4.23333000 | 2.46488700 |
| C | 2.80110200  | -0.79879000 | 4.64445200 |
| H | 2.80899000  | 0.22006300  | 5.06515600 |

## References

1. L. G. Ferraresso, E. G. R. de Arruda, T. P. L. de Moraes, R. B. Fazzi, A. D. C., Ferreira and C. Abbehausen, Copper (II) and zinc (II) dinuclear enzymes model compounds: The nature of the metal ion in the biological function, *Journal of molecular structure*, 2017, **1150**, 316-328.
2. P., Comba, A., Eisenschmidt, N., Kipper and J. Schießl, Glycosidase-and  $\beta$ -lactamase-like activity of dinuclear copper (II) patellamide complexes, *Journal of Inorganic Biochemistry*, 2016, **159**, 70-75.
3. Umayal, Muthaiah, and GovindasamyMugesh, Metallo- $\beta$ -lactamase and phosphotriesterase activities of some zinc (II) complexes, *InorganicaChimicaActa*, 2011, **372**, 353-361.

4. N. V. Kaminskaia, B. Spingler and S. J. Lippard, Intermediate in  $\beta$ -lactam hydrolysis catalyzed by a dinuclear zinc (II) complex: relevance to the mechanism of metallo- $\beta$ -lactamase, *Journal of the American Chemical Society*, 2001, **123**, 6555-6563.
5. N. V. Kaminskaia, B. Spingler and S. J. Lippard, Hydrolysis of  $\beta$ -lactam antibiotics catalyzed by dinuclear zinc (II) complexes: Functional mimics of metallo- $\beta$ -lactamases, *Journal of the American Chemical Society*, 2000, **122**, 6411-6422.
6. L. J. Daumann, L. R. Gahan, P. Comba and G. Schenk, Cadmium (II) complexes: mimics of organophosphate pesticide degrading enzymes and metallo- $\beta$ -lactamases, *Inorganic chemistry*, 2012, **51**, 7669-7681.
